# Supplementary material for: A polymer coated MNP scaffold for targeted drug delivery and improvement of rheumatoid arthritis
Source: Royal Society of Chemistry journal article supplement (doi:10.1039/d0py00070a), 2020-01-01
Supplement: d0py00070a1.pdf [file d0py00070a1.pdf]

## Supporting Information

### **Polymer coated MNPs scaffold for targeted drug delivery and improvement of Rheumatoid Arthritis**

Seyedeh Mina Malaekhepoor,<sup>a</sup> Katayon Derakhshandeh,<sup>b</sup> Rasool Haddadi,<sup>c</sup> Alireza Noorian,<sup>d</sup> Ramin Ghorbani-Vaghei<sup>a,\*</sup>

*<sup>a</sup>Department of Organic Chemistry, Faculty of Chemistry, Bu-Ali Sina University, Hamadan 6517838683, Iran, Tel.: +98(813)8380709*

*E-mail: rgvaghei@yahoo.com (Ramin Ghorbani-Vaghei)*

*<sup>b</sup>Department of Pharmaceutics, School of Pharmacy, Hamadan University of Medical Sciences, 6517838678, Hamadan, Iran*

*<sup>c</sup>Department of Pharmacology & Toxicology, School of Pharmacy, Hamadan University of Medical Sciences, 6517838678, Hamadan, Iran*

*<sup>d</sup>Department of Pathobiology, School of Veterinary Science, Bu-Ali Sina University, Hamadan, 6517658978, Iran*

### **Synthesis of DHAA–Fe<sub>3</sub>O<sub>4</sub> NPs**

DHAA–Fe<sub>3</sub>O<sub>4</sub> NPs were synthesized through the previous procedure [50]. In brief, (10 mL, 0.1 M) FeCl<sub>3</sub>.6H<sub>2</sub>O (aq) was added to (20 mL, 0.45 M) NaHCO<sub>3</sub> (aq) and, then, the suspension was stirred for 30 min. Subsequently, (10 mL, 0.01 M) vitamin C (aq) was added and, then, the mixture was stirred for another 10 minutes. Afterwards, it was transferred into an autoclave with a volume of (50 mL) and kept at 150 °C for 4 h in order to get DHAA–Fe<sub>3</sub>O NPs. The synthesized nanoparticles were purified three times with *deionized* water (DI) and ethanol, were dried at room temperature for 24 hrs and eventually redispersed in DI water.

### **Synthesis of DHAA–Fe<sub>3</sub>O<sub>4</sub>@HA NPs**

For the modification of DHAA–Fe<sub>3</sub>O<sub>4</sub> NPs, at first, HA (0.01 g), EDC (4.1 mg) and DMAP (2.3 mg) were dissolved in purified water (4 mL) and stirred at room temperature for 1 h, then DHAA–Fe<sub>3</sub>O<sub>4</sub> NPs (0.1 g) were dispersed (1 min) in DI water (6 mL), and, finally, they were added to the mixture and stirred at room temperature for two days. The resulting product isolation which was performed by an external magnet was washed with DI water (3 × 20 mL) and ethanol (3 × 20 mL). Finally, DHAA–Fe<sub>3</sub>O<sub>4</sub>@HA NPs were dried at room temperature for overnight and redispersed in DI water.

### **Synthesis of DHAA–Fe<sub>3</sub>O<sub>4</sub>@HA@SSZ NPs**

For synthesizing DHAA–Fe<sub>3</sub>O<sub>4</sub>@HA@SSZ, firstly, SSZ (1 mg) was dissolved in DMSO (4 mL) and, then, EDC (0.4 mg) and DMAP (0.2 mg) were added into the solution. The mixture was stirred for 1 h. Then, DHAA–Fe<sub>3</sub>O<sub>4</sub>@HA NPs (10 mg), that were dispersed in DMSO (4 mL), were added to the reaction mixture and, finally, were continuously stirred at 38 °C for an overnight. The resulting product was collected through magnetic separation, washed with DMSO (2 × 20 mL) and DI water (2 × 20 mL) and, then, dried at room temperature for a day in order to obtain DHAA–Fe<sub>3</sub>O<sub>4</sub>@HA@SSZ. The resulting NPs were redispersed in DI water and PBS buffer.

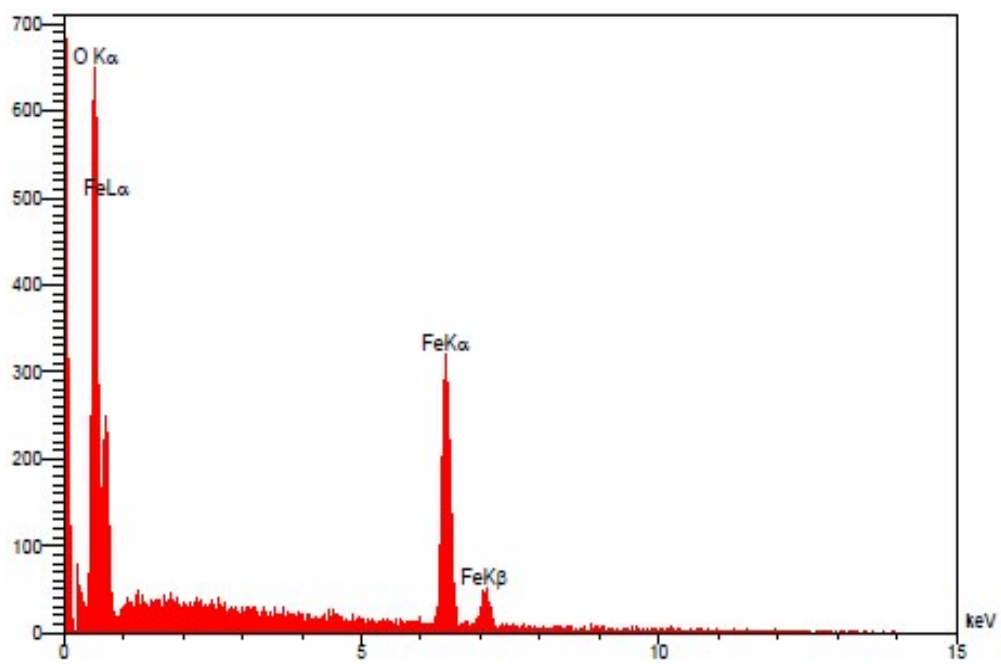

**Figure S1.** EDS analysis of DHAA-Fe<sub>3</sub>O<sub>4</sub> NPs.

| Element       | Line Type | Apparent Concentration | k Ratio | Wt%    | Wt% Sigma | Atomic % |
|---------------|-----------|------------------------|---------|--------|-----------|----------|
| <b>C</b>      | K series  | 1.17                   | 0.01174 | 5.27   | 0.29      | 15.45    |
| <b>N</b>      | K series  | 0.43                   | 0.00077 | 0.24   | 0.21      | 0.60     |
| <b>O</b>      | K series  | 22.50                  | 0.07570 | 15.57  | 0.23      | 34.23    |
| <b>Fe</b>     | K series  | 53.60                  | 0.53599 | 78.92  | 0.37      | 49.72    |
| <b>Total:</b> |           |                        |         | 100.00 |           | 100.00   |

**Figure S2.** EDS analysis of DHAA-Fe<sub>3</sub>O<sub>4</sub>@HA NPs.

| Element       | Line Type | Apparent Concentration | k Ratio | Wt%    | Wt% Sigma | Atomic % |
|---------------|-----------|------------------------|---------|--------|-----------|----------|
| <b>C</b>      | K series  | 1.84                   | 0.01837 | 7.60   | 0.30      | 16.95    |
| <b>N</b>      | K series  | 1.69                   | 0.00300 | 0.94   | 0.26      | 1.79     |
| <b>O</b>      | K series  | 44.04                  | 0.14821 | 31.07  | 0.31      | 51.99    |
| <b>S</b>      | K series  | 0.68                   | 0.00585 | 0.91   | 0.07      | 0.76     |
| <b>Fe</b>     | K series  | 38.86                  | 0.38862 | 59.49  | 0.40      | 28.52    |
| <b>Total:</b> |           |                        |         | 100.00 |           | 100.00   |

**Figure S3.** EDS analysis of DHAA-Fe<sub>3</sub>O<sub>4</sub>@HA@SSZ NPs.

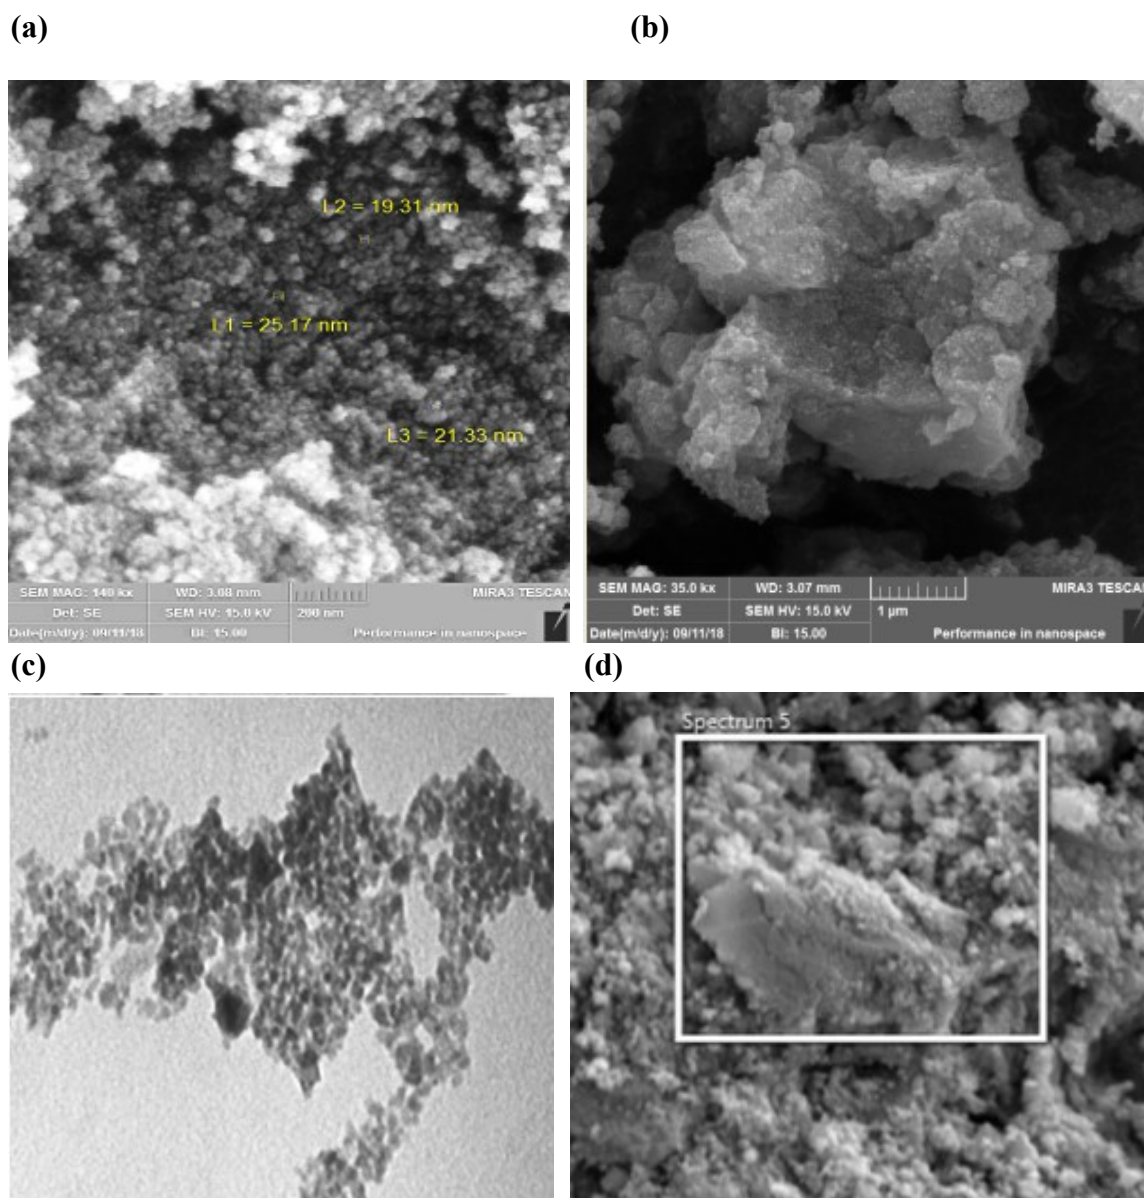

**Figure S4.** (a), (b) FE-SEM images of DHAA-Fe<sub>3</sub>O<sub>4</sub>@HA NPs, (c) TEM images of DHAA-Fe<sub>3</sub>O<sub>4</sub>@HA@SSZ NPs, Scale bar: 75 nm, (d) FE-SEM images of DHAA-Fe<sub>3</sub>O<sub>4</sub>@HA@SSZ NPs.

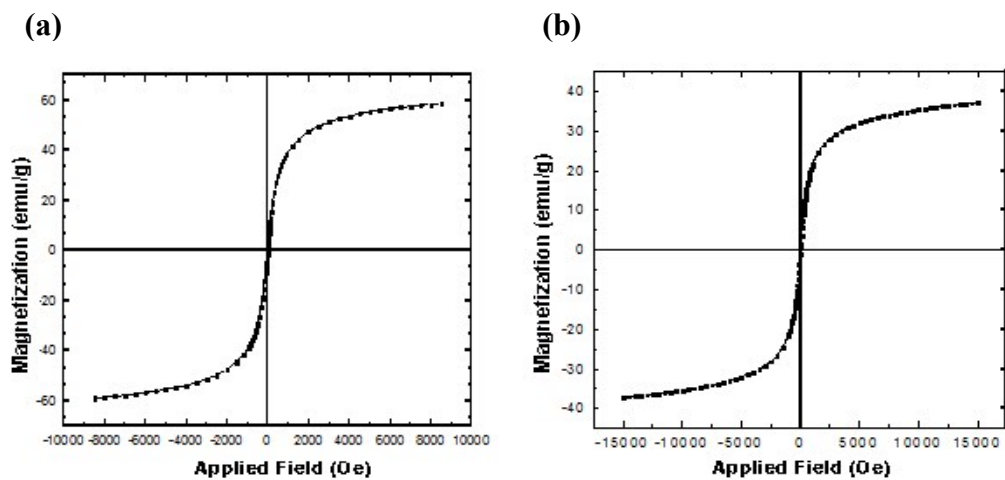

**Figure S5.** (a) VSM of  $\text{Fe}_3\text{O}_4$ , (b) VSM of DHAA- $\text{Fe}_3\text{O}_4$ @HA NPs.

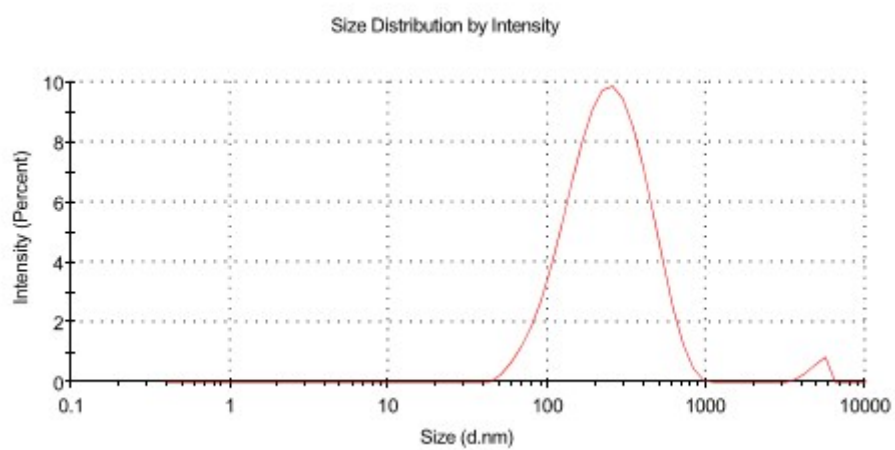

**Figure S6.** DLS size distribution of DHAA-Fe<sub>3</sub>O<sub>4</sub>@HA@SSZ NPs.

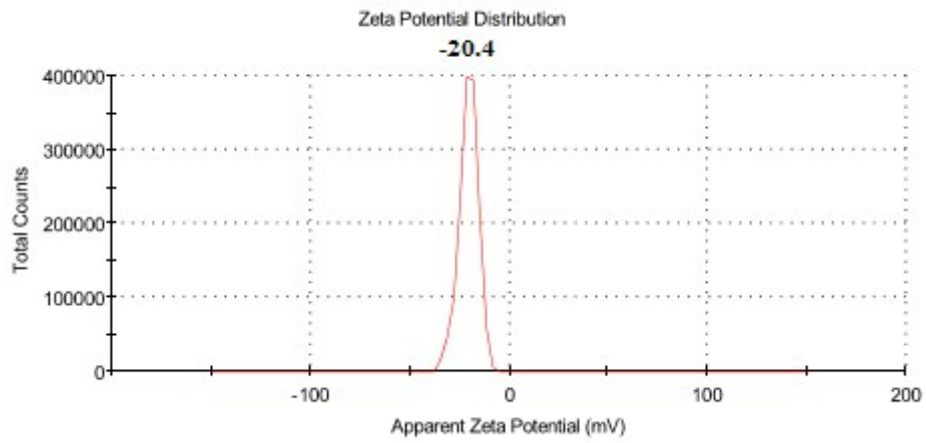

**Figure S7.** Zeta potential of DHAA-Fe<sub>3</sub>O<sub>4</sub>@HA NPs.



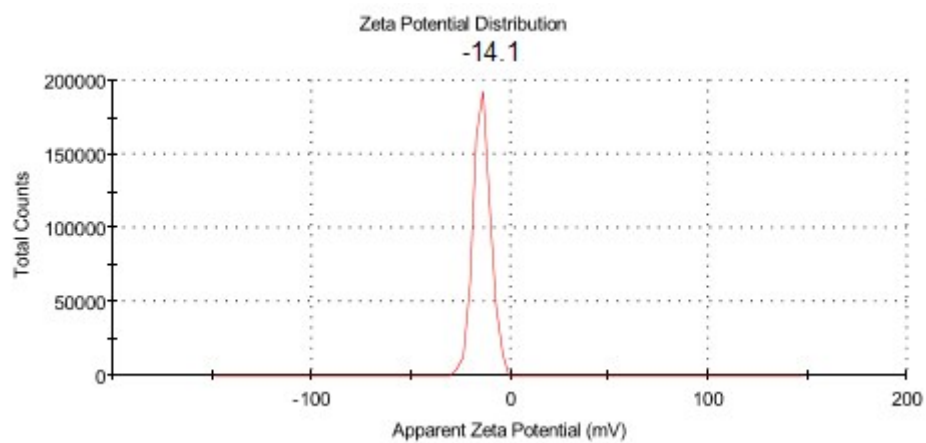

**Figure S8.** Zeta potential of DHAA-Fe<sub>3</sub>O<sub>4</sub>@HA@SSZ NPs.

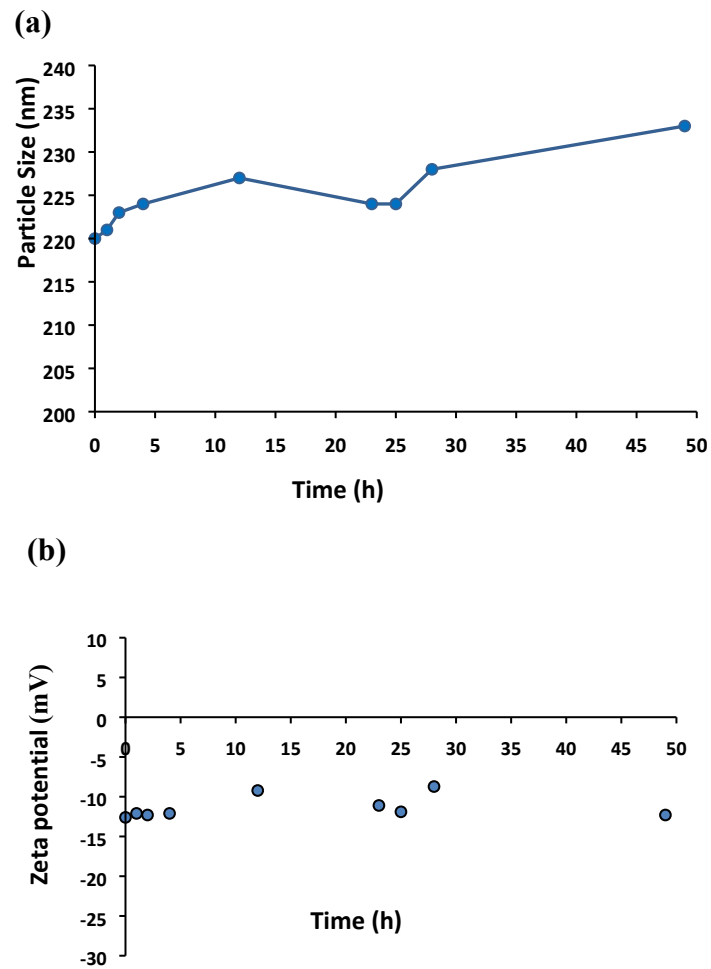

**Figure S9.** (a) Particle size and (b) Zeta potential of DHAA-Fe<sub>3</sub>O<sub>4</sub>@HA@SSZ NPs in PBS at 37 °C.
